# Supplementary material for: Case Report: Insulin Edema and Acute Renal Failure
Source: Oxford University Press journal article supplement (doi:10.2337/dc12-2137), 2013-04-13

## SUPPLEMENTARY DATA

**Supplementary Figure 1.** Time-course of body weight, serum creatinine and serum proteins. The figure shows the time-course evolution of body weight (red), serum creatinine concentration (black), and serum proteins concentration (blue). The period of treatment with furosemide is also indicated.

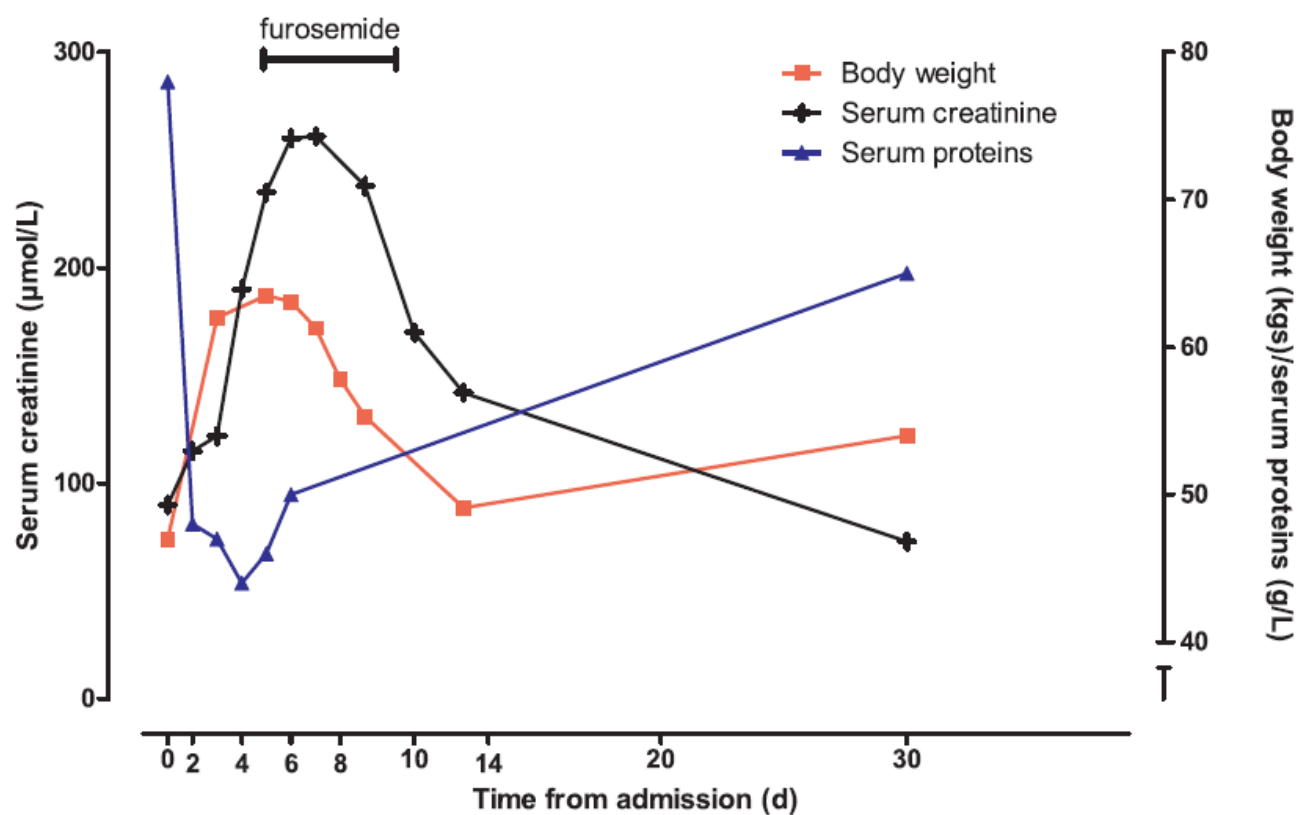

Supplement: dc122137supplementarydata.pdf [file dc122137supplementarydata.pdf]
